# Supplementary material
Source: ML conference proceedings conference paper supplement (https://proceedings.mlr.press/v89/dedieu19a.html)
Supplement: Supplementary file 1 [file dedieu19a-supp.pdf]

# Appendices

## A Usefull properties of sub-Gaussian random variables

This section presents useful preliminary results satisfied by sub-Gaussian random variables. In particular, Lemma 5 provides a probabilistic upper-bound satisfied by the maximum of independent sub-Gaussian random variables.

### A.1 Preliminary results

Under Assumption 3, the random variables  $\sum_{i=1}^n \partial f(\langle \mathbf{x}_i, \boldsymbol{\beta}^* \rangle, y_i) x_{ij}$ ,  $\forall j$  are sub-Gaussian. They consequently satisfy the next Lemma 3:

**Lemma 3** *Let  $Z \sim \text{subG}(\sigma^2)$  for a fixed  $\sigma > 0$ . Then for any  $t > 0$  it holds*

$$\mathbb{E}(\exp(tZ)) \leq e^{4\sigma^2 t^2}.$$

*In addition, for any positive integer  $\ell \geq 1$  we have:*

$$\mathbb{E}(|Z|^\ell) \leq (2\sigma^2)^{\ell/2} \ell \Gamma(\ell/2)$$

*where  $\Gamma$  is the Gamma function defined as  $\Gamma(t) = \int_0^\infty x^{t-1} e^{-x} dx$ ,  $\forall t > 0$ .*

*Finally, let  $Y = Z^2 - \mathbb{E}(Z^2)$  then we have*

$$\mathbb{E}\left(\exp\left(\frac{1}{16\sigma^2} Y\right)\right) \leq \frac{3}{2}, \tag{19}$$

*and as a consequence  $\mathbb{E}(\exp(\frac{1}{16\sigma^2} Z^2)) \leq 2$ .*

**Proof:** The two first results correspond to Lemmas 1.4 and 1.5 from Rigollet [2015].

In particular  $\mathbb{E}(|Z|^2) \leq 4\sigma^2$ .

In addition, using the proof of Lemma 1.12 we have:

$$\mathbb{E}(\exp(tY)) \leq 1 + 128t^2\sigma^4, \forall |t| \leq \frac{1}{16\sigma^2}.$$

Equation (19) holds in the particular case where  $t = 1/16\sigma^2$ .

The last part of the lemma combines our precedent results with the observation that  $\frac{3}{2}e^{1/4} \leq 2$ . □

### A.2 Proof of Lemma 1

As a first consequence of Lemma 3, we derive the proof of Lemma 1 – stated in Section 2.3.

**Proof:** We note  $S_i = \partial f(\langle \mathbf{x}_i, \boldsymbol{\beta}^* \rangle, y_i)$ ,  $\forall i$ .

Since  $\boldsymbol{\beta}^*$  minimizes the theoretical loss, we have  $\mathbb{E}(S_i x_{ij}) = 0$ ,  $\forall i, j$ .

By definition of a sub-Gaussian random variable, we fix  $M > 0$  such that:  $\forall t > 0$ ,

$$\mathbb{P}(|S_i x_{i,j}| > t) \leq 2 \exp\left(-\frac{t^2}{2L^2 M^2}\right), \forall i, j.$$

Then from Lemma 3 it holds:

$$\mathbb{E}(\exp(t S_i x_{ij})) \leq e^{4L^2 M^2 t^2}, \forall t > 0, \forall i, j.$$

As a consequence, using Lemma 3 for the independent random variables  $(S_1 x_{1,j}, \dots, S_n x_{n,j})$ , it holds  $\forall t > 0$ ,

$$\mathbb{E}\left(\exp\left(t \sum_{i=1}^n S_i x_{i,j}\right)\right) = \prod_{i=1}^n \mathbb{E}(\exp(t S_i x_{ij})) \leq \prod_{i=1}^n e^{4L^2 M^2 t^2} = e^{4nL^2 M^2 t^2}.$$

Let  $M_1 = 2\sqrt{2}M\sqrt{n}$ , then with a Chernoff bound:

$$\mathbb{P}\left(\sum_{i=1}^n S_i x_{i,j} > t\right) \leq \min_{s>0} \exp\left(\frac{M_1^2 L^2 s^2}{2} - st\right) = \exp\left(-\frac{t^2}{2L^2 M_1^2}\right), \forall t > 0,$$

which concludes the proof.  $\square$

### A.3 A bound for the maximum of independent sub-Gaussian variables

The next two technical lemmas derive a probabilistic upper-bound for the maximum of sub-Gaussian random variables. Lemma 4 extends Proposition E.1 [Bellec et al., 2016] to sub-Gaussian random variables.

**Lemma 4** *Let  $g_1, \dots, g_p$  be independent sub-Gaussian random variables with variance  $\sigma^2$ . Denote by  $(g_{(1)}, \dots, g_{(p)})$  a non-increasing rearrangement of  $(|g_1|, \dots, |g_p|)$ . Then  $\forall t > 0$  and  $\forall j \in \{1, \dots, p\}$ :*

$$\mathbb{P}\left(\frac{1}{j\sigma^2} \sum_{k=1}^j g_{(k)}^2 > t \log\left(\frac{2p}{j}\right)\right) \leq \left(\frac{2p}{j}\right)^{1-\frac{t}{16}}.$$

**Proof:** Let  $j \in \{1, \dots, p\}$ . We first apply a Chernoff bound:

$$\mathbb{P}\left(\frac{1}{j\sigma^2} \sum_{k=1}^j g_{(k)}^2 > t \log\left(\frac{2p}{j}\right)\right) \leq \mathbb{E}\left(\exp\left(\frac{1}{16j\sigma^2} \sum_{k=1}^j g_{(k)}^2\right)\right) \left(\frac{2p}{j}\right)^{-\frac{t}{16}}.$$

Then we use Jensen inequality to obtain

$$\begin{aligned} \mathbb{E}\left(\exp\left(\frac{1}{16j\sigma^2} \sum_{k=1}^j g_{(k)}^2\right)\right) &\leq \frac{1}{j} \sum_{k=1}^j \mathbb{E}\left(\exp\left(\frac{1}{16\sigma^2} g_{(k)}^2\right)\right) \\ &\leq \frac{1}{j} \sum_{k=1}^p \mathbb{E}\left(\exp\left(\frac{1}{16\sigma^2} g_k^2\right)\right) \leq \frac{2p}{j} \text{ with Lemma 3.} \end{aligned}$$

$\square$

Using Lemma 4, we can derive the following bound which holds with high probability.

**Lemma 5** *We consider the assumptions and notations of Lemma 4. In addition, we define the coefficients  $\lambda_j = \sqrt{\log(2p/j)}$ ,  $j = 1, \dots, p$ . Then for  $\delta \in (0, \frac{1}{2})$ , it holds with probability at least  $1 - \delta$ :*

$$\sup_{j=1, \dots, p} \left\{ \frac{g_{(j)}}{\sigma \lambda_j} \right\} \leq 12 \sqrt{\log(1/\delta)}.$$

**Proof:** We fix  $\delta \in (0, \frac{1}{2})$  and  $j \in \{1, \dots, p\}$ . We upper-bound  $g_{(j)}^2$  by the average of all larger variables:

$$g_{(j)}^2 \leq \frac{1}{j} \sum_{k=1}^j g_{(k)}^2.$$

Applying Lemma 4 gives, for  $t > 0$ :

$$\mathbb{P} \left( \frac{g_{(j)}^2}{\sigma^2 \lambda_j^2} > t \right) \leq \mathbb{P} \left( \frac{1}{j \sigma^2} \sum_{k=1}^j g_{(k)}^2 > t \lambda_j^2 \right) \leq \left( \frac{j}{2p} \right)^{\frac{t}{16} - 1}.$$

We fix  $t = 144 \log(1/\delta)$  and use an union bound to get:

$$\mathbb{P} \left( \sup_{j=1, \dots, p} \frac{g_{(j)}}{\sigma \lambda_j} > 12 \sqrt{\log(1/\delta)} \right) \leq \left( \frac{1}{2p} \right)^{9 \log(1/\delta) - 1} \sum_{j=1}^p j^{9 \log(1/\delta) - 1}.$$

Since  $\delta < \frac{1}{2}$  it holds that  $9 \log(1/\delta) - 1 \geq 9 \log(2) - 1 > 0$ , then the map  $t > 0 \mapsto t^{9 \log(1/\delta) - 1}$  is increasing. An integral comparison gives:

$$\sum_{j=1}^p j^{9 \log(1/\delta) - 1} \leq \frac{1}{2} (p+1)^{9 \log(1/\delta)} = \frac{1}{2} \delta^{-9 \log(p+1)}.$$

In addition  $9 \log(1/\delta) - 1 \geq 7 \log(1/\delta) = -7 \log(\delta)$  and

$$\left( \frac{1}{2p} \right)^{9 \log(1/\delta) - 1} \leq \left( \frac{1}{2p} \right)^{-7 \log(\delta)} = \delta^{7 \log(2p)}.$$

Finally, by assuming  $p \geq 2$ , then we have  $7 \log(2p) - 9 \log(p+1) > 1$ , thus:

$$\mathbb{P} \left( \sup_{j=1, \dots, p} \frac{g_{(j)}}{\sigma \lambda_j} > 12 \sqrt{\log(1/\delta)} \right) \leq \delta,$$

which concludes the proof. □

## B Proof of Theorem 2

We use the minimality of  $\hat{\beta}$  and Lemma 4 to derive the cone condition.

**Proof:** We assume without loss of generality that  $|h_1| \geq \dots \geq |h_p|$ . We define  $S_0 = \{1, \dots, k^*\}$  as the set of the  $k^*$  highest coefficients of  $\mathbf{h} = \hat{\beta} - \beta^*$ .

$\hat{\beta}$  is the solution of Problem (2) hence:

$$\frac{1}{n} \sum_{i=1}^n f(\langle \mathbf{x}_i, \hat{\beta} \rangle; y_i) + \lambda \|\hat{\beta}\|_1 \leq \frac{1}{n} \sum_{i=1}^n f(\langle \mathbf{x}_i, \beta^* \rangle; y_i) + \lambda \|\beta^*\|_1. \quad (20)$$

Using the definition of  $\Delta(\beta^*, \mathbf{h})$  as introduced in Theorem 3, Equation (20) can be written in a compact form as:

$$\Delta(\beta^*, \mathbf{h}) \leq \lambda \|\beta^*\|_1 - \lambda \|\hat{\beta}\|_1.$$

Introducing the support  $S^*$  of  $\beta^*$  we have

$$\begin{aligned}\Delta(\beta^*, \mathbf{h}) &\leq \lambda \|\beta_{S^*}^*\|_1 - \lambda \|\hat{\beta}_{S^*}\|_1 - \lambda \|\hat{\beta}_{(S^*)^c}\|_1 \\ &\leq \lambda \|\mathbf{h}_{S^*}\|_1 - \lambda \|\mathbf{h}_{(S^*)^c}\|_1 \\ &\leq \lambda \|\mathbf{h}_{S_0}\|_1 - \lambda \|\mathbf{h}_{(S_0)^c}\|_1,\end{aligned}\tag{21}$$

where this last relation holds by definition of  $S_0$ . We now want to lower bound  $\Delta(\beta^*, \mathbf{h})$ . Exploiting the existence of a bounded sub-Gradient  $\partial f$  we obtain

$$\Delta(\beta^*, \mathbf{h}) \geq S(\beta^*, \mathbf{h}) := \frac{1}{n} \sum_{i=1}^n \partial f(\langle \mathbf{x}_i, \beta^* \rangle; y_i) \langle \mathbf{x}_i, \mathbf{h} \rangle.$$

In addition we have:

$$\begin{aligned}|S(\beta^*, \mathbf{h})| &= \left| \frac{1}{n} \sum_{i=1}^n \sum_{j=1}^p \partial f(\langle \mathbf{x}_i, \beta^* \rangle; y_i) x_{ij} h_j \right| \\ &\leq \frac{1}{\sqrt{n}} \sum_{j=1}^p \left( \frac{1}{\sqrt{n}} \left| \sum_{i=1}^n \partial f(\langle \mathbf{x}_i, \beta^* \rangle; y_i) x_{ij} \right| \right) |h_j|.\end{aligned}$$

Let us define the independent random variables  $g_j = \frac{1}{\sqrt{n}} \sum_{i=1}^n \partial f(\langle \mathbf{x}_i, \beta^* \rangle; y_i) x_{ij}$ ,  $j = 1, \dots, p$ .

Assumption 3 guarantees that  $g_1, \dots, g_p$  are sub-Gaussian with variance  $L^2 M^2$ . A first upper-bound of the quantity  $|S(\mathbf{h})|$  could be obtained by considering the maximum of the sequence  $\{g_j\}$ . However Lemma 5 gives us a stronger result.

Indeed, since  $\delta \leq 1$  we introduce a non-increasing rearrangement  $(g_{(1)}, \dots, g_{(p)})$  of  $(|g_1|, \dots, |g_p|)$ . We recall that  $S_0 = \{1, \dots, k^*\}$  denotes the subset of indexes of the  $k^*$  highest elements of  $\mathbf{h}$  and we use Lemma 5 to get, with probability at least  $1 - \frac{\delta}{2}$ :

$$\begin{aligned}|S(\beta^*, \mathbf{h})| &\leq \frac{1}{\sqrt{n}} \sum_{j=1}^p g_j |h_j| = \frac{1}{\sqrt{n}} \sum_{j=1}^p g_{(j)} |h_{(j)}| = \frac{1}{\sqrt{n}} \sum_{j=1}^p \frac{g_{(j)}}{LM\lambda_j} LM\lambda_j |h_{(j)}| \\ &\leq \frac{1}{\sqrt{n}} \sup_{j=1, \dots, p} \left\{ \frac{g_{(j)}}{LM\lambda_j} \right\} \sum_{j=1}^p LM\lambda_j |h_{(j)}| \\ &\leq 12LM \sqrt{\frac{\log(2/\delta)}{n}} \sum_{j=1}^p \lambda_j |h_{(j)}| \text{ with Lemma 5} \\ &\leq 12LM \sqrt{\frac{\log(2/\delta)}{n}} \sum_{j=1}^p \lambda_j |h_j| \text{ since } \lambda_1 \geq \dots \geq \lambda_p \text{ and } |h_1| \geq \dots \geq |h_p| \\ &\leq 12LM \sqrt{\frac{\log(2/\delta)}{n}} \left( \sum_{j=1}^{k^*} \lambda_j |h_j| + \lambda_{k^*} \sum_{j=k^*}^p |h_j| \right) \\ &= 12LM \sqrt{\frac{\log(2/\delta)}{n}} \left( \sum_{j=1}^{k^*} \lambda_j |h_j| + \lambda_{k^*} \|\mathbf{h}_{(S_0)^c}\|_1 \right).\end{aligned}\tag{22}$$

Cauchy-Schwartz inequality leads to:

$$\sum_{j=1}^{k^*} \lambda_j |h_j| \leq \sqrt{\sum_{j=1}^{k^*} \lambda_j^2} \|\mathbf{h}_{S_0}\|_2 \leq \sqrt{k^* \log(2pe/k^*)} \|\mathbf{h}_{S_0}\|_2,$$

where we have used the Stirling formula to get  $(\frac{n}{e})^n \leq n!$  and we have used:

$$\begin{aligned} \sum_{j=1}^{k^*} \lambda_j^2 &= \sum_{j=1}^{k^*} \log(2p/j) = k^* \log(2p) - \log(k^*) \\ &\leq k^* \log(2p) - k^* \log(k^*/e) = k^* \log(2pe/k^*). \end{aligned}$$

In the statement of Theorem 2 we have defined  $\lambda = 12\alpha LM \sqrt{n^{-1} \log(2pe/k^*) \log(2/\delta)}$ . Because  $\lambda_{k^*} \leq \sqrt{\log(2pe/k^*)}$ , Equation (22) leads to:

$$|S(\boldsymbol{\beta}^*, \mathbf{h})| \leq \frac{1}{\alpha} \lambda \left( \sqrt{k^*} \|\mathbf{h}_{S_0}\|_2 + \|\mathbf{h}_{(S_0)^c}\|_1 \right)$$

Combined with Equation (21), it holds with probability at least  $1 - \frac{\delta}{2}$ :

$$-\frac{\lambda}{\alpha} \left( \sqrt{k^*} \|\mathbf{h}_{S_0}\|_2 + \|\mathbf{h}_{(S_0)^c}\|_1 \right) \leq \lambda \|\mathbf{h}_{S_0}\|_1 - \lambda \|\mathbf{h}_{(S_0)^c}\|_1,$$

which immediately leads to:

$$\|\mathbf{h}_{(S_0)^c}\|_1 \leq \frac{\alpha}{\alpha-1} \|\mathbf{h}_{S_0}\|_1 + \frac{\sqrt{k^*}}{\alpha-1} \|\mathbf{h}_{S_0}\|_2.$$

We conclude that  $\mathbf{h} \in \Lambda \left( S_0, \frac{\alpha}{\alpha-1}, \frac{\sqrt{k^*}}{\alpha-1} \right)$  with probability at least  $1 - \frac{\delta}{2}$ .  $\square$

## C Proof of Theorem 3:

**Proof:** Let  $k \in \{1, \dots, p\}$  and  $S_1, \dots, S_q$  be a partition of  $\{1, \dots, p\}$  such that  $q = \lceil p/k \rceil$  and  $|S_\ell| \leq k, \forall \ell$ . We divide the proof of the theorem in 3 steps. We first upper-bound the inner supremum for a sequence of  $k$  sparse vectors  $\mathbf{z}_{S_1}, \dots, \mathbf{z}_{S_q}$  satisfying  $\|\mathbf{z}_{S_\ell}\|_1 \leq 3R, \forall \ell$ . We then extend this bound for the supremum over the compact set of sequences considered through an  $\epsilon$ -net argument.

**Step 1:** Let us fix a sequence  $\mathbf{z}_{S_1}, \dots, \mathbf{z}_{S_q} \in \mathbb{R}^p$ :  $\text{Supp}(\mathbf{z}_{S_j}) \subset S_j, \forall j$  and  $\|\mathbf{z}_{S_\ell}\|_1 \leq 3R, \forall \ell$ . In particular,  $\|\mathbf{z}_{S_j}\|_0 \leq k, \forall j$ . In the rest of the proof, we define  $\mathbf{z}_{S_0} = \mathbf{0}$  and:

$$\mathbf{w}_\ell = \boldsymbol{\beta}^* + \sum_{j=1}^{\ell} \mathbf{z}_{S_j}, \quad \forall \ell \in \{1, \dots, q\}. \quad (23)$$

In addition, we introduce  $Z_{i\ell}, \forall i \in \{1, \dots, n\}, \forall \ell \in \{1, \dots, q\}$  as follows:

$$Z_{i\ell} = f(\langle \mathbf{x}_i, \mathbf{w}_\ell \rangle; y_i) - f(\langle \mathbf{x}_i, \mathbf{w}_{\ell-1} \rangle; y_i) = f(\langle \mathbf{x}_i, \mathbf{w}_{\ell-1} + \mathbf{z}_{S_\ell} \rangle; y_i) - f(\langle \mathbf{x}_i, \mathbf{w}_{\ell-1} \rangle; y_i).$$

We fix  $\ell \in \{1, \dots, q\}$ . Let us note that:

$$\begin{aligned}\Delta(\mathbf{w}_{\ell-1}, \mathbf{z}_{S_\ell}) &= \frac{1}{n} \sum_{i=1}^n f(\langle \mathbf{x}_i, \mathbf{w}_{\ell-1} + \mathbf{z}_{S_\ell} \rangle; y_i) - \frac{1}{n} \sum_{i=1}^n f(\langle \mathbf{x}_i, \mathbf{w}_{\ell-1} \rangle; y_i) \\ &= \frac{1}{n} \sum_{i=1}^n \{f(\langle \mathbf{x}_i, \mathbf{w}_{\ell-1} + \mathbf{z}_{S_\ell} \rangle; y_i) - f(\langle \mathbf{x}_i, \mathbf{w}_{\ell-1} \rangle; y_i)\} \\ &= \frac{1}{n} \sum_{i=1}^n Z_{i\ell}.\end{aligned}\tag{24}$$

Assumption 1 guarantees that  $f(\cdot, y)$  is  $L$ -Lipschitz  $\forall y$  then:

$$|Z_{i\ell}| \leq L |\langle \mathbf{x}_i, \mathbf{z}_{S_\ell} \rangle|.$$

Then using Assumption 4.1( $k$ ) on the  $k$  sparse vector  $\mathbf{z}_{S_\ell}$  it holds:

$$|\Delta(\mathbf{w}_{\ell-1}, \mathbf{z}_{S_\ell})| \leq \frac{1}{n} \sum_{i=1}^n |Z_{i\ell}| \leq \frac{1}{n} \sum_{i=1}^n L |\langle \mathbf{x}_i, \mathbf{z}_{S_\ell} \rangle| = \frac{L}{n} \|\mathbb{X} \mathbf{z}_{S_\ell}\|_1 \leq \frac{L\mu(k)}{\sqrt{nk}} \|\mathbf{z}_{S_\ell}\|_1.$$

Hence, with Hoeffding's lemma, the centered bounded random variable  $\Delta(\mathbf{w}_{\ell-1}, \mathbf{z}_{S_\ell}) - \mathbb{E}(\Delta(\mathbf{w}_{\ell-1}, \mathbf{z}_{S_\ell}))$  is sub-Gaussian with variance  $\frac{L^2\mu(k)^2}{nk} \|\mathbf{z}_{S_\ell}\|_1^2$ . It then hold,  $\forall t > 0$ ,

$$\mathbb{P}(|\Delta(\mathbf{w}_{\ell-1}, \mathbf{z}_{S_\ell}) - \mathbb{E}(\Delta(\mathbf{w}_{\ell-1}, \mathbf{z}_{S_\ell}))| \geq t \|\mathbf{z}_{S_\ell}\|_1) \leq 2 \exp\left(-\frac{knt^2}{2L^2\mu(k)^2}\right).\tag{25}$$

Equation (25) holds for all values of  $\ell$ . Thus, an union bound immediately gives:

$$\mathbb{P}\left(\sup_{\ell=1, \dots, q} \{|\Delta(\mathbf{w}_{\ell-1}, \mathbf{z}_{S_\ell}) - \mathbb{E}(\Delta(\mathbf{w}_{\ell-1}, \mathbf{z}_{S_\ell}))| - t \|\mathbf{z}_{S_\ell}\|_1\} \geq 0\right) \leq 2 \left\lceil \frac{p}{k} \right\rceil \exp\left(-\frac{knt^2}{2L^2\mu(k)^2}\right).\tag{26}$$

**Step 2:** We extend the result to any sequence of vectors  $\mathbf{z}_{S_1}, \dots, \mathbf{z}_{S_q} \in \mathbb{R}^p : \text{Supp}(\mathbf{z}_{S_\ell}) \subset S_\ell$  and  $\|\mathbf{z}_{S_\ell}\|_1 \leq 3R, \forall \ell$  through an  $\epsilon$ -net argument.

We recall that an  $\epsilon$ -net of a set  $\mathcal{I}$  is a subset  $\mathcal{N}$  of  $\mathcal{I}$  such that each element of  $\mathcal{I}$  is at a distance at most  $\epsilon$  of  $\mathcal{N}$ . We know from Lemma 1.18 from Rigollet [2015], that for any  $\epsilon \in (0, 1)$ , the ball  $\{\mathbf{z} \in \mathbb{R}^d : \|\mathbf{z}\|_1 \leq R\}$  has an  $\epsilon$ -net of cardinality  $|\mathcal{N}| \leq \left(\frac{2R+1}{\epsilon}\right)^d$  – the  $\epsilon$ -net is defined in term for the L1 norm. In addition, by following the proof of the lemma, we can create this set such that it contains  $\mathbf{0}$ .

Consequently, we use Equation (26) on a product of  $\epsilon$ -nets  $\mathcal{N}_{k,R} = \prod_{\ell=1}^q \mathcal{N}_{k,R}^\ell$ . Each  $\mathcal{N}_{k,R}^\ell$  is an  $\epsilon$ -net of the bounded set of  $k$  sparse vectors  $\mathcal{I}_{k,R}^\ell = \{\mathbf{z}_{S_\ell} \in \mathbb{R}^p : \text{Supp}(\mathbf{z}_{S_\ell}) \subset S_\ell ; \|\mathbf{z}_{S_\ell}\|_1 \leq 3R\}$  which contains  $\mathbf{0}_{S_\ell}$ . We note  $\mathcal{I}_{k,R} = \prod_{\ell=1}^q \mathcal{I}_{k,R}^\ell$ . It then holds:

$$\begin{aligned}\mathbb{P}\left(\sup_{(\mathbf{z}_{S_1}, \dots, \mathbf{z}_{S_q}) \in \mathcal{N}_{k,R}} \left\{ \sup_{\ell=1, \dots, q} \{|\Delta(\mathbf{w}_{\ell-1}, \mathbf{z}_{S_\ell}) - \mathbb{E}(\Delta(\mathbf{w}_{\ell-1}, \mathbf{z}_{S_\ell}))| - t \|\mathbf{z}_{S_\ell}\|_1\} \geq 0 \right\}\right) \\ \leq 2 \left\lceil \frac{p}{k} \right\rceil \left(\frac{6R+1}{\epsilon}\right)^k \left\lceil \frac{p}{k} \right\rceil \exp\left(-\frac{knt^2}{2L^2\mu(k)^2}\right) \leq 2 \left(\frac{2p}{k}\right)^2 \left(\frac{6R+1}{\epsilon}\right)^k \exp\left(-\frac{knt^2}{2L^2\mu(k)^2}\right).\end{aligned}\tag{27}$$

**Step 3:** We now extend Equation (27) to control any vector in  $\mathcal{I}_{k,R}$ . For  $\mathbf{z}_{S_1}, \dots, \mathbf{z}_{S_q} \in \mathcal{I}_{k,R}$ , there exists  $\tilde{\mathbf{z}}_{S_1}, \dots, \tilde{\mathbf{z}}_{S_q} \in \mathcal{N}_{k,R}$  such that  $\|\mathbf{z}_{S_\ell} - \tilde{\mathbf{z}}_{S_\ell}\|_1 \leq \epsilon, \forall \ell$ . Similarly to Equation (23), we define:

$$\tilde{\mathbf{w}}_\ell = \beta^* + \sum_{j=1}^{\ell} \tilde{\mathbf{z}}_{S_j}, \quad \forall \ell \in \{1, \dots, q\}.$$

For a given  $t$ , let us define

$$f_t(\mathbf{w}_{\ell-1}, \mathbf{z}_{S_\ell}) = |\Delta(\mathbf{w}_{\ell-1}, \mathbf{z}_{S_\ell}) - \mathbb{E}(\mathbf{w}_{\ell-1}, \mathbf{z}_{S_\ell})| - t\|\mathbf{z}_{S_\ell}\|_1, \forall \ell.$$

We fix  $\ell_0(t)$  such that  $\ell_0(t) \in \operatorname{argmax}_{\ell=1, \dots, q} \{f_{7t}(\mathbf{w}_{\ell-1}, \mathbf{z}_{S_\ell})\}$ . The choice of  $7t$  will be justified later. We fix  $t$  and will just note  $\ell_0 = \ell_0(t)$  when no confusion can be made.

With Assumption 1 we obtain:

$$\begin{aligned} & \left| \Delta(\mathbf{w}_{\ell_0-1}, \mathbf{z}_{S_{\ell_0}}) - \Delta(\tilde{\mathbf{w}}_{\ell_0-1}, \tilde{\mathbf{z}}_{S_{\ell_0}}) \right| \\ &= \frac{1}{n} \left| \sum_{i=1}^n f(\langle \mathbf{x}_i, \mathbf{w}_{\ell_0} \rangle; y_i) - \sum_{i=1}^n f(\langle \mathbf{x}_i, \tilde{\mathbf{w}}_{\ell_0} \rangle; y_i) + \sum_{i=1}^n f(\langle \mathbf{x}_i, \tilde{\mathbf{w}}_{\ell_0-1} \rangle; y_i) - \sum_{i=1}^n f(\langle \mathbf{x}_i, \mathbf{w}_{\ell_0-1} \rangle; y_i) \right| \\ &\leq \frac{1}{n} \sum_{i=1}^n L |\langle \mathbf{x}_i, \mathbf{w}_{\ell_0} - \tilde{\mathbf{w}}_{\ell_0} \rangle| + \frac{1}{n} \sum_{i=1}^n L |\langle \mathbf{x}_i, \mathbf{w}_{\ell_0-1} - \tilde{\mathbf{w}}_{\ell_0-1} \rangle| \\ &= \frac{1}{n} \sum_{i=1}^n L \left| \sum_{\ell=1}^{\ell_0} \langle \mathbf{x}_i, \mathbf{z}_{S_\ell} - \tilde{\mathbf{z}}_{S_\ell} \rangle \right| + \frac{1}{n} \sum_{i=1}^n L \left| \sum_{\ell=1}^{\ell_0-1} \langle \mathbf{x}_i, \mathbf{z}_{S_\ell} - \tilde{\mathbf{z}}_{S_\ell} \rangle \right| \\ &\leq \frac{2}{n} \sum_{i=1}^n \sum_{\ell=1}^q L |\langle \mathbf{x}_i, \mathbf{z}_{S_\ell} - \tilde{\mathbf{z}}_{S_\ell} \rangle| \\ &= \frac{2}{\sqrt{n}} \sum_{\ell=1}^q \frac{L}{\sqrt{n}} \|\mathbf{X}(\mathbf{z}_{S_\ell} - \tilde{\mathbf{z}}_{S_\ell})\|_1 \\ &\leq \frac{2}{\sqrt{n}} \sum_{\ell=1}^q \frac{L}{\sqrt{k}} \mu(k) \|\mathbf{z}_{S_\ell} - \tilde{\mathbf{z}}_{S_\ell}\|_1 \\ &\leq \frac{2p}{k\sqrt{kn}} L\mu(k)\epsilon \leq \eta\epsilon. \end{aligned} \tag{28}$$

where  $\eta = \frac{2L\mu(k)}{\sqrt{n}}$  and we have used Assumption 5.1(k). It then holds:

$$\begin{aligned} f_t(\tilde{\mathbf{w}}_{\ell_0-1}, \tilde{\mathbf{z}}_{S_{\ell_0}}) &\geq f_t(\mathbf{w}_{\ell_0-1}, \mathbf{z}_{S_{\ell_0}}) - \left| \Delta(\mathbf{w}_{\ell_0-1}, \mathbf{z}_{S_{\ell_0}}) - \Delta(\tilde{\mathbf{w}}_{\ell_0-1}, \tilde{\mathbf{z}}_{S_{\ell_0}}) \right| \\ &\quad - \left| \mathbb{E}(\Delta(\mathbf{w}_{\ell_0-1}, \mathbf{z}_{S_{\ell_0}}) - \Delta(\tilde{\mathbf{w}}_{\ell_0-1}, \tilde{\mathbf{z}}_{S_{\ell_0}})) \right| - t\|\mathbf{z}_{S_{\ell_0}} - \tilde{\mathbf{z}}_{S_{\ell_0}}\|_1 \\ &\geq f_t(\mathbf{w}_{\ell_0-1}, \mathbf{z}_{S_{\ell_0}}) - 2\eta\epsilon - t\epsilon. \end{aligned}$$

**Case 1:** Let us assume that  $\|\mathbf{z}_{S_{\ell_0}}\|_1 \geq \epsilon/2$  and that  $t \geq \eta$ , then we have:

$$f_t(\tilde{\mathbf{w}}_{\ell_0-1}, \tilde{\mathbf{z}}_{S_{\ell_0}}) \geq f_t(\mathbf{w}_{\ell_0-1}, \mathbf{z}_{S_{\ell_0}}) - 2(2\eta + t)\|\mathbf{z}_{S_{\ell_0}}\|_1 \geq f_{7t}(\mathbf{w}_{\ell_0-1}, \mathbf{z}_{S_{\ell_0}}). \tag{29}$$

**Case 2:** We now assume  $\|\mathbf{z}_{S_{\ell_0}}\|_1 \leq \epsilon/2$ . Since  $\mathbf{0}_{S_{\ell_0}} \in \mathcal{N}_{k,R}$  we derive similarly to Equation (28):

$$\left| \Delta(\mathbf{w}_{\ell_0-1}, \mathbf{z}_{S_{\ell_0}}) - \Delta(\mathbf{w}_{\ell_0-1}, \mathbf{0}_{S_{\ell_0}}) \right| \leq \frac{L\mu(k)}{\sqrt{nk}} \|\mathbf{z}_{S_{\ell_0}}\|_1,$$

which then implies that:

$$f_{7t}(\mathbf{w}_{\ell_0-1}, \mathbf{z}_{S_{\ell_0}}) \leq f_{7t}(\mathbf{w}_{\ell_0-1}, \mathbf{0}_{S_{\ell_0}}) + \frac{2L\mu(k)}{\sqrt{nk}} \|\mathbf{z}_{S_{\ell_0}}\|_1 - 7t \|\mathbf{z}_{S_{\ell_0}}\|_1,$$

and this quantity is smaller than  $f_{7t}(\mathbf{w}_{\ell_0-1}, \mathbf{0}_{S_{\ell_0}})$  as long as  $7t \geq \frac{2L\mu(k)}{\sqrt{nk}}$ . The latter condition is satisfied if  $t \geq \eta$ .

In this case, we can define a new  $\tilde{\ell}_0$  for the sequence  $\mathbf{z}_{S_1}, \dots, \mathbf{z}_{S_{\ell_0-1}}, \mathbf{0}_{S_{\ell_0}}, \mathbf{z}_{S_{\ell_0+1}}, \dots, \mathbf{z}_{S_q}$ . After a finite number of iteration, by using the result in Equation (29) and the definition of  $\ell_0$ , we finally get that  $f_{7t}(\mathbf{w}_{\ell_0-1}, \mathbf{z}_{S_{\ell_0}}) \leq f_t(\tilde{\mathbf{w}}_{\ell_0-1}, \tilde{\mathbf{z}}_{S_{\ell_0}})$  for some  $\tilde{\mathbf{z}}_{S_1}, \dots, \tilde{\mathbf{z}}_{S_q} \in \mathcal{N}_{k,R}$ .

As a consequence of cases 1 and 2, we obtain:  $\forall t \geq \eta, \forall \mathbf{z}_{S_1}, \dots, \mathbf{z}_{S_q} \in \mathcal{I}_{k,R}, \exists \tilde{\mathbf{z}}_{S_1}, \dots, \tilde{\mathbf{z}}_{S_q} \in \mathcal{N}_{k,R}$ :

$$\sup_{\ell=1, \dots, q} f_{7t}(\mathbf{w}_{\ell-1}, \mathbf{z}_{S_\ell}) = f_{7t}(\mathbf{w}_{\ell_0-1}, \mathbf{z}_{S_{\ell_0}}) \leq f_t(\tilde{\mathbf{w}}_{\ell_0-1}, \tilde{\mathbf{z}}_{S_{\ell_0}}) \leq \sup_{\ell=1, \dots, q} f_t(\tilde{\mathbf{w}}_{\ell-1}, \tilde{\mathbf{z}}_{S_\ell}).$$

This last relation is equivalent to saying that  $\forall t \geq 7\eta$ :

$$\sup_{\mathbf{z}_{S_1}, \dots, \mathbf{z}_{S_q} \in \mathcal{I}_{k,R}} \left\{ \sup_{\ell=1, \dots, q} f_t(\mathbf{w}_{\ell-1}, \mathbf{z}_{S_\ell}) \right\} \leq \sup_{\mathbf{z}_{S_1}, \dots, \mathbf{z}_{S_q} \in \mathcal{N}_{k,R}} \left\{ \sup_{\ell=1, \dots, q} f_{t/7}(\tilde{\mathbf{w}}_{\ell-1}, \tilde{\mathbf{z}}_{S_\ell}) \right\}. \quad (30)$$

As a consequence, we have  $\forall t \geq 7\eta$ :

$$\begin{aligned} & \mathbb{P} \left( \sup_{\mathbf{z}_{S_1}, \dots, \mathbf{z}_{S_q} \in \mathcal{I}_{k,R}} \left\{ \sup_{\ell=1, \dots, q} \{ |\Delta(\mathbf{w}_{\ell-1}, \mathbf{z}_{S_\ell}) - \mathbb{E}(\Delta(\mathbf{w}_{\ell-1}, \mathbf{z}_{S_\ell}))| - t \|\mathbf{z}_{S_\ell}\|_1 \} \right\} \geq 0 \right) \\ & \leq \mathbb{P} \left( \sup_{\mathbf{z}_{S_1}, \dots, \mathbf{z}_{S_q} \in \mathcal{N}_{k,R}} \left\{ \sup_{\ell=1, \dots, q} \left\{ |\Delta(\mathbf{w}_{\ell-1}, \mathbf{z}_{S_\ell}) - \mathbb{E}(\Delta(\mathbf{w}_{\ell-1}, \mathbf{z}_{S_\ell}))| - \frac{t}{7} \|\mathbf{z}_{S_\ell}\|_1 \right\} \right\} \geq 0 \right) \quad (31) \\ & \leq 2 \left( \frac{2p}{k} \right)^2 \left( \frac{6R+1}{\epsilon} \right)^k \exp \left( -\frac{kn(t/7)^2}{2L^2\mu(k)^2} \right) \\ & \leq \left( \frac{4p}{k} \right)^2 3^k \exp \left( -\frac{knt^2}{98L^2\mu(k)^2} \right) \text{ by fixing } \epsilon = 2R \text{ and since } R \geq 1. \end{aligned}$$

Thus we select  $t$  such that  $t \geq 7\eta$  and that the condition  $t^2 \geq \frac{98L^2\mu(k)^2}{kn} \left[ k \log(3) + 2 \log \left( \frac{4p}{k} \right) + \log \left( \frac{2}{\delta} \right) \right]$  holds<sup>1</sup>. To this end, we define:

$$\tau = 14L\mu(k) \sqrt{\frac{\log(3)}{n} + \frac{\log(4p/k)}{nk} + \frac{\log(2/\delta)}{nk}} \geq 7\eta.$$

We conclude that with probability at least  $1 - \frac{\delta}{2}$ :

$$\sup_{\mathbf{z}_{S_1}, \dots, \mathbf{z}_{S_q} \in \mathcal{I}_{k,R}} \left\{ \sup_{\ell=1, \dots, q} \{ |\Delta(\mathbf{w}_{\ell-1}, \mathbf{z}_{S_\ell}) - \mathbb{E}(\Delta(\mathbf{w}_{\ell-1}, \mathbf{z}_{S_\ell}))| - \tau (\|\mathbf{z}_{S_\ell}\|_1 \vee \eta) \} \right\} \leq 0.$$

□

<sup>1</sup>A somewhat faster proof would have consisted in fixing  $\epsilon = 2R$  in the definition of the  $\epsilon$ -net – of size now bounded by  $3^k$  – and in noting that because of the L1-constraint, each element  $\mathbf{z}_{S_\ell}$  is at a distance at most  $R = \|\mathbf{z}_{S_\ell}\|_1/2$  of its closest neighborhood in the  $\epsilon$ -net. However, we prefer the more general proof presented herein.



## D Proof of Theorem 4:

**Proof:** The proof is divided in two steps. First, we lower-bound the quantity  $\Delta(\boldsymbol{\beta}^*, \mathbf{h})$  with Theorem 3. Second, we refine this lower-bound with the use of the cone condition derived in Theorem 2 and the restricted eigenvalue condition presented in Assumption 4.2.

**Step 1:** Let us fix the partition of  $\{1, \dots, p\}$ :  $S_1 = \{1, \dots, k^*\}$ ,  $S_2 = \{k^* + 1, \dots, 2k^*\}$ ,  $\dots$ ,  $S_q$  – with  $q = \lceil p/k^* \rceil$ . Recall that  $\mathbf{h} = \hat{\boldsymbol{\beta}} - \boldsymbol{\beta}^*$ . Then it holds  $|S_\ell| \leq k^*$  and  $\|\mathbf{h}_{S_\ell}\|_1 \leq 3R$ . We thus can use Theorem 3 for the corresponding sequence  $\mathbf{h}_{S_1}, \dots, \mathbf{h}_{S_q}$  of  $k^*$  sparse vectors.

$$\begin{aligned}
\Delta(\boldsymbol{\beta}^*, \mathbf{h}) &= \frac{1}{n} \sum_{i=1}^n f(\langle \mathbf{x}_i, \boldsymbol{\beta}^* + \mathbf{h} \rangle; y_i) - \frac{1}{n} \sum_{i=1}^n f(\langle \mathbf{x}_i, \boldsymbol{\beta}^* \rangle; y_i) \\
&= \frac{1}{n} \sum_{i=1}^n f\left(\langle \mathbf{x}_i, \boldsymbol{\beta}^* + \sum_{j=1}^q \mathbf{h}_{S_j} \rangle; y_i\right) - \frac{1}{n} \sum_{i=1}^n f(\langle \mathbf{x}_i, \boldsymbol{\beta}^* \rangle; y_i) \\
&= \sum_{\ell=1}^q \left\{ \frac{1}{n} \sum_{i=1}^n f\left(\langle \mathbf{x}_i, \boldsymbol{\beta}^* + \sum_{j=1}^{\ell} \mathbf{h}_{S_j} \rangle; y_i\right) - \frac{1}{n} \sum_{i=1}^n f\left(\langle \mathbf{x}_i, \boldsymbol{\beta}^* + \sum_{j=0}^{\ell-1} \mathbf{h}_{S_j} \rangle; y_i\right) \right\} \quad (32) \\
&= \sum_{\ell=1}^q \Delta\left(\boldsymbol{\beta}^* + \sum_{j=0}^{\ell-1} \mathbf{h}_{S_j}, \mathbf{h}_{S_\ell}\right) \\
&= \sum_{\ell=1}^q \Delta(\mathbf{w}_{\ell-1}, \mathbf{h}_{S_\ell}).
\end{aligned}$$

where we have defined  $\mathbf{w}_\ell = \boldsymbol{\beta}^* + \sum_{j=1}^{\ell} \mathbf{h}_{S_j}$ ,  $\forall \ell$  and  $\mathbf{h}_{S_0} = \mathbf{0}$  as in the proof of Theorem 3. Consequently, with Theorem 3, it holds with probability at least  $1 - \frac{\delta}{2}$ :

$$|\Delta(\mathbf{w}_{\ell-1}, \mathbf{h}_{S_\ell}) - \mathbb{E}(\mathbf{w}_{\ell-1}, \mathbf{h}_{S_\ell})| \geq \tau \|\mathbf{h}_{S_\ell}\|_1, \forall \ell,$$

where  $\tau = \tau(k^*) = 14L\mu(k^*) \sqrt{\frac{\log(3)}{n} + \frac{\log(4p/k^*)}{nk^*} + \frac{\log(2/\delta)}{nk^*}}$  is fixed in the rest of the proof.

As a result, following Equation (32), we have with probability at least  $1 - \frac{\delta}{2}$ :

$$\begin{aligned}
\Delta(\boldsymbol{\beta}^*, \mathbf{h}) &\geq \sum_{\ell=1}^q \{\mathbb{E}(\mathbf{w}_{\ell-1}, \mathbf{h}_{S_\ell}) - \tau \|\mathbf{h}_{S_\ell}\|_1\} \\
&= \mathbb{E}\left(\sum_{\ell=1}^q \Delta(\mathbf{w}_{\ell-1}, \mathbf{h}_{S_\ell})\right) - \sum_{\ell=1}^q \tau \|\mathbf{h}_{S_\ell}\|_1 \quad (33) \\
&= \mathbb{E}(\Delta(\boldsymbol{\beta}^*, \mathbf{h})) - \tau \|\mathbf{h}\|_1.
\end{aligned}$$

In addition, since the samples are identical drawn:

$$\mathbb{E}(\Delta(\boldsymbol{\beta}^*, \mathbf{h})) = \frac{1}{n} \sum_{i=1}^n \mathbb{E}\{f(\langle \mathbf{x}_i, \boldsymbol{\beta}^* + \mathbf{h} \rangle; y_i) - f(\langle \mathbf{x}_i, \boldsymbol{\beta}^* \rangle; y_i)\} = \mathcal{L}(\boldsymbol{\beta}^* + \mathbf{h}) - \mathcal{L}(\boldsymbol{\beta}^*).$$

Consequently, we conclude that with probability at least  $1 - \frac{\delta}{2}$ :

$$\Delta(\boldsymbol{\beta}^*, \mathbf{h}) \geq \mathcal{L}(\boldsymbol{\beta}^* + \mathbf{h}) - \mathcal{L}(\boldsymbol{\beta}^*) - \tau \|\mathbf{h}\|_1. \quad (34)$$

**Step 2:** We now lower-bound the right-hand side of Equation (34). Since  $\mathcal{L}$  is twice differentiable, a Taylor development around  $\beta^*$  gives:

$$\mathcal{L}(\beta^* + \mathbf{h}) - \mathcal{L}(\beta^*) = \nabla \mathcal{L}(\beta^*)^T \mathbf{h} + \frac{1}{2} \mathbf{h}^T \nabla^2 \mathcal{L}(\beta^*)^T \mathbf{h} + o(\|\mathbf{h}\|_2).$$

The optimality of  $\beta^*$  implies  $\nabla \mathcal{L}(\beta^*) = 0$ . In addition, Theorem 2 states that  $\mathbf{h} \in \Lambda(S_0, \gamma_1, \gamma_2)$  with probability at least  $1 - \frac{\delta}{2}$ . Consequently, we can use the restricted eigenvalue condition defined in Assumption 4.2( $k^*, \gamma$ ). However we do not want to keep the term  $o(\|\mathbf{h}\|_2)$  as it can hide non trivial dependencies. To overcome this difficulty, we use the convexity of  $\mathcal{L}$  and the maximum radius  $r(k^*, \gamma)$  introduced in the growth condition Assumption 5.2.

**Case 1:** If  $\|\mathbf{h}\|_2 \leq r(k^*)$  – where  $r(k^*)$  is a shorthand for  $r(k^*, \gamma)$  – then with Theorem 2 and Assumption 4.2( $k, \gamma$ ), it holds with probability at least  $1 - \frac{\delta}{2}$ :

$$\mathcal{L}(\beta^* + \mathbf{h}) - \mathcal{L}(\beta^*) \geq \frac{1}{4} \kappa(k^*) \|\mathbf{h}\|_2^2. \quad (35)$$

**Case 2:** If now  $\|\mathbf{h}\|_2 \geq r(k^*)$ , then using the convexity of  $\mathcal{L}$  thus of  $t \rightarrow \mathcal{L}(\beta^* + t\mathbf{h})$ , we similarly obtain with same probability:

$$\begin{aligned} \mathcal{L}(\beta^* + \mathbf{h}) - \mathcal{L}(\beta^*) &\geq \frac{\|\mathbf{h}\|_2}{r(k^*)} \left\{ \mathcal{L}\left(\beta^* + \frac{r(k^*)}{\|\mathbf{h}\|_2} \mathbf{h}\right) - \mathcal{L}(\beta^*) \right\} \text{ by convexity} \\ &\geq \frac{\|\mathbf{h}\|_2}{r(k^*)} \inf_{\substack{\mathbf{z} \in \Lambda(S_0, \gamma_1, \gamma_2) \\ \|\mathbf{z}\|_2 = r(k^*)}} \{ \mathcal{L}(\beta^* + \mathbf{z}) - \mathcal{L}(\beta^*) \} \\ &\geq \frac{\|\mathbf{h}\|_2}{r(k^*)} \frac{1}{4} \kappa(k^*) r(k^*)^2 = \frac{1}{4} \kappa(k^*) r(k^*) \|\mathbf{h}\|_2. \end{aligned} \quad (36)$$

Combining Equations (34), (35) and (36), we conclude that with probability at least  $1 - \delta$  the following restricted strong convexity with L1 tolerance function holds:

$$\Delta(\beta^*, \mathbf{h}) \geq \frac{1}{4} \kappa(k^*) \|\mathbf{h}\|_2^2 \wedge \frac{1}{4} \kappa(k^*) r(k^*) \|\mathbf{h}\|_2 - \tau \|\mathbf{h}\|_1. \quad (37)$$

To derive the condition for the L2 tolerance function, we use our cone condition derived in Theorem 2. We recall that  $S_0$  has been defined as the subset of the  $k^*$  highest elements of  $\mathbf{h}$ . It thus holds:

$$\begin{aligned} \|\mathbf{h}\|_1 &= \|\mathbf{h}_{S_0}\|_1 + \|\mathbf{h}_{(S_0)^c}\|_1 \\ &\leq \|\mathbf{h}_{S_0}\|_1 + \frac{\alpha}{\alpha-1} \|\mathbf{h}_{S_0}\|_1 + \frac{\sqrt{k^*}}{\alpha-1} \|\mathbf{h}_{S_0}\|_2 \text{ since } \mathbf{h} \in \Lambda(S_0, \gamma_1, \gamma_2) \\ &= \frac{2\alpha-1}{\alpha-1} \|\mathbf{h}_{S_0}\|_1 + \frac{\sqrt{k^*}}{\alpha-1} \|\mathbf{h}_{S_0}\|_2 \\ &\leq \frac{2\alpha-1}{\alpha-1} \sqrt{k^*} \|\mathbf{h}_{S_0}\|_2 + \frac{\sqrt{k^*}}{\alpha-1} \|\mathbf{h}_{S_0}\|_2 \text{ with Cauchy-Schwartz inequality on the } k^* \text{ sparse vector } \mathbf{h}_{S_0} \\ &\leq \frac{2\alpha}{\alpha-1} \sqrt{k^*} \|\mathbf{h}\|_2. \end{aligned} \quad (38)$$

We thus conclude that it holds with probability at least  $1 - \delta$ :

$$\Delta(\beta^*, \mathbf{h}) \geq \frac{1}{4} \kappa(k^*) \|\mathbf{h}\|_2^2 \wedge \frac{1}{4} \kappa(k^*) r(k^*) \|\mathbf{h}\|_2 - \frac{2\alpha}{\alpha-1} \tau \sqrt{k^*} \|\mathbf{h}\|_2. \quad (39)$$

□

## E Proof of Theorem 1

**Proof:** We now prove our main Theorem 1. Following Equation (21) we have:

$$\Delta(\boldsymbol{\beta}^*, \mathbf{h}) \leq \lambda \|\mathbf{h}_{S_0}\|_1 - \lambda \|\mathbf{h}_{(S_0)^c}\|_1.$$

Thus using the restricted strong convexity derived in Theorem 4, it holds with probability at least  $1 - \delta$ :

$$\begin{aligned} \frac{1}{4} \kappa(k^*) \{ \|\mathbf{h}\|_2^2 \wedge r(k^*) \|\mathbf{h}\|_2 \} &\leq \frac{2\alpha}{\alpha-1} \tau \sqrt{k^*} \|\mathbf{h}\|_2 + \lambda \|\mathbf{h}_{S_0}\|_1 - \lambda \|\mathbf{h}_{(S_0)^c}\|_1 \\ &\leq \frac{2\alpha}{\alpha-1} \tau \sqrt{k^*} \|\mathbf{h}\|_2 + \lambda \sqrt{k^*} \|\mathbf{h}_{S_0}\|_2 \\ &\leq \left( \frac{2\alpha}{\alpha-1} \tau + \lambda \right) \sqrt{k^*} \|\mathbf{h}\|_2. \end{aligned} \quad (40)$$

With the definitions of  $\tau$  and  $\lambda$  as in Theorem 2 and 3, Equation (40) leads to:

$$\begin{aligned} \frac{1}{4} \kappa(k^*) \{ \|\mathbf{h}\|_2 \wedge r(k^*) \} &\leq 12\alpha LM \sqrt{\frac{k^* \log(2pe/k^*)}{n} \log(2/\delta)} \\ &\quad + \frac{28\alpha}{\alpha-1} L\mu(k^*) \sqrt{\frac{\log(3)}{n} + \frac{\log(4p/k^*)}{nk^*} + \frac{\log(2/\delta)/k^*}{nk^*}}. \end{aligned}$$

Exploiting Assumption 5.2( $k^*, \gamma, \delta$ ), and using that  $\alpha \geq 2$ , we obtain with probability at least  $1 - \delta$ :

$$\|\mathbf{h}\|_2^2 \lesssim \left( \frac{\alpha LM}{\kappa(k^*)} \right)^2 \frac{k^* \log(p/k^*) \log(2/\delta)}{n} + \left( \frac{\alpha L\mu(k^*)}{\kappa(k^*)} \right)^2 \frac{\log(3) + \log(4p/k^*)/k^* + \log(2/\delta)/k^*}{n}.$$

which concludes the proof.  $\square$

## F Proof of Corollary 1

**Proof:** In order to derive the bound in expectation, we define the bounded random variable:

$$Z = \frac{\kappa(k^*)^2}{\alpha^2 L^2} \|\hat{\boldsymbol{\beta}} - \boldsymbol{\beta}^*\|_2^2.$$

Since Assumption 5( $k^*, \gamma, \delta_0$ ) is satisfied for a small enough  $\delta_0$ , we can fix  $C$  such that  $\forall \delta \in (0, 1)$ , it holds with probability at least  $1 - \delta$ :

$$Z \leq CM^2 H \log(2/\delta) + C \frac{\mu(k^*)^2}{n} \log(2/\delta) \quad \text{where } H = \frac{k^* \log(p/k^*)}{n}.$$

Then it holds  $\forall t \geq t_0 = \log(4)$ :

$$\mathbb{P} \left( Z/C \geq M^2 H t + \frac{\mu(k^*)^2}{n} t \right) \leq 2e^{-t}.$$

Let  $q_0 = M^2 H t_0 + \frac{\mu(k^*)^2}{n} t_0$ , then  $\forall q \geq q_0$

$$\mathbb{P}(Z/C \geq q) \leq 2 \exp \left( - \frac{n}{nM^2 H + \mu(k^*)^2} q \right) \leq 2 \exp \left( - \frac{q}{M^2 H} \right).$$

Consequently, by integration we have:

$$\begin{aligned}
\mathbb{E}(Z) &= \int_0^{+\infty} C\mathbb{P}(|Z|/C \geq q) dq \\
&\leq \int_{q_0}^{+\infty} C\mathbb{P}(|Z|/C \geq q) dq + Cq_0 \\
&\leq \int_{q_0}^{+\infty} 2Ce^{-\frac{q}{M^2H}} dq + Cq_0 \\
&\leq 2CM^2He^{-\frac{q_0}{M^2H}} + Cq_0 \\
&\leq 2CM^2H + CM^2H \log(4) + C\frac{\mu(k^*)}{n} \log(4) \\
&\leq C_1 \left( M^2H + \frac{\mu(k^*)^2}{n} \right)
\end{aligned} \tag{41}$$

for  $C_1 = 2C + \log(4)$ . Hence we conclude:

$$\mathbb{E} \left( \|\hat{\boldsymbol{\beta}} - \boldsymbol{\beta}^*\|_2^2 \right) \lesssim \left( \frac{\alpha L}{\kappa(k^*)} \right)^2 \left\{ M^2 \frac{k^* \log(p/k^*)}{n} + \frac{\mu(k^*)}{\sqrt{n}} \right\}.$$

□

## G Proof of Theorem 5

**Proof:** We fix  $\tau > 0$  and denote  $\mathbb{X} = (\mathbf{X}_1, \dots, \mathbf{X}_p) \in \mathbb{R}^{n \times p}$  the design matrix. For  $\boldsymbol{\beta} \in \mathbb{R}^p$ , we define  $\mathbf{w}^\tau(\boldsymbol{\beta}) \in \mathbb{R}^n$  by:

$$w_i^\tau(\boldsymbol{\beta}) = \min \left( 1, \frac{1}{2\tau} |z_i| \right) \text{sign}(z_i), \quad \forall i$$

where  $z_i = 1 - \mathbf{y}_i \mathbf{x}_i^T \boldsymbol{\beta}$ ,  $\forall i$ . We easily check that

$$\mathbf{w}^\tau(\boldsymbol{\beta}) = \underset{\|\mathbf{w}\|_\infty \leq 1}{\text{argmax}} \frac{1}{2n} \sum_{i=1}^n (z_i + w_i z_i) - \frac{\tau}{2n} \|\mathbf{w}\|_2^2.$$

Then the gradient of the smooth hinge loss is

$$\nabla g^\tau(\boldsymbol{\beta}) = -\frac{1}{2n} \sum_{i=1}^n (1 + w_i^\tau(\boldsymbol{\beta})) y_i \mathbf{x}_i \in \mathbb{R}^p.$$

For every couple  $\boldsymbol{\beta}, \boldsymbol{\gamma} \in \mathbb{R}^p$  we have:

$$\nabla g^\tau(\boldsymbol{\beta}) - \nabla g^\tau(\boldsymbol{\gamma}) = \frac{1}{2n} \sum_{i=1}^n (w_i^\tau(\boldsymbol{\gamma}) - w_i^\tau(\boldsymbol{\beta})) y_i \mathbf{x}_i. \tag{42}$$

For  $\mathbf{a}, \mathbf{b} \in \mathbb{R}^n$  we define the vector  $\mathbf{a} * \mathbf{b} = (a_i b_i)_{i=1}^n$ . Then we can rewrite Equation (42) as:

$$\nabla g^\tau(\boldsymbol{\beta}) - \nabla g^\tau(\boldsymbol{\gamma}) = \frac{1}{2n} \mathbb{X}^T [\mathbf{y} * (\mathbf{w}^\tau(\boldsymbol{\gamma}) - \mathbf{w}^\tau(\boldsymbol{\beta}))]. \tag{43}$$

The operator norm associated to the Euclidean norm of the matrix  $\mathbb{X}$  is  $\|\mathbb{X}\| = \max_{\|z\|_2=1} \|\mathbb{X}z\|_2$ .

Let us recall that  $\|\mathbb{X}\|^2 = \|\mathbb{X}^T\|^2 = \|\mathbb{X}^T\mathbb{X}\| = \mu_{\max}(\mathbb{X}^T\mathbb{X})$  corresponds to the highest eigenvalue of the matrix  $\mathbb{X}^T\mathbb{X}$ .

Consequently, Equation (43) leads to:

$$\|\nabla L^\tau(\boldsymbol{\beta}) - \nabla L^\tau(\boldsymbol{\gamma})\|_2 \leq \frac{1}{2n} \|\mathbb{X}\| \|\mathbf{w}^\tau(\boldsymbol{\gamma}) - \mathbf{w}^\tau(\boldsymbol{\beta})\|_2. \quad (44)$$

In addition, the first order necessary conditions for optimality applied to  $\mathbf{w}^\tau(\boldsymbol{\beta})$  and  $\mathbf{w}^\tau(\boldsymbol{\gamma})$  give:

$$\sum_{i=1}^n \left\{ \frac{1}{2n} (1 - y_i \mathbf{x}_i^T \boldsymbol{\beta}) - \frac{\tau}{n} w_i^\tau(\boldsymbol{\beta}) \right\} \{w_i^\tau(\boldsymbol{\gamma}) - w_i^\tau(\boldsymbol{\beta})\} \leq 0, \quad (45)$$

and

$$\sum_{i=1}^n \left\{ \frac{1}{2n} (1 - y_i \mathbf{x}_i^T \boldsymbol{\gamma}) - \frac{\tau}{n} w_i^\tau(\boldsymbol{\gamma}) \right\} \{w_i^\tau(\boldsymbol{\beta}) - w_i^\tau(\boldsymbol{\gamma})\} \leq 0. \quad (46)$$

Then by adding Equations (45) and (46) and rearranging the terms we have:

$$\begin{aligned} & \tau \|\mathbf{w}^\tau(\boldsymbol{\gamma}) - \mathbf{w}^\tau(\boldsymbol{\beta})\|_2^2 \\ & \leq \frac{1}{2} \sum_{i=1}^n y_i \mathbf{x}_i^T (\boldsymbol{\beta} - \boldsymbol{\gamma}) (w_i^\tau(\boldsymbol{\gamma}) - w_i^\tau(\boldsymbol{\beta})) \\ & \leq \frac{1}{2} \|\mathbb{X}(\boldsymbol{\beta} - \boldsymbol{\gamma})\|_2 \|\mathbf{w}^\tau(\boldsymbol{\gamma}) - \mathbf{w}^\tau(\boldsymbol{\beta})\|_2 \\ & \leq \frac{1}{2} \|\mathbb{X}\| \|\boldsymbol{\beta} - \boldsymbol{\gamma}\|_2 \|\mathbf{w}^\tau(\boldsymbol{\gamma}) - \mathbf{w}^\tau(\boldsymbol{\beta})\|_2, \end{aligned}$$

where we have used Cauchy-Schwartz inequality. We then have:

$$\|\mathbf{w}^\tau(\boldsymbol{\gamma}) - \mathbf{w}^\tau(\boldsymbol{\beta})\|_2 \leq \frac{1}{2\tau} \|\mathbb{X}\| \|\boldsymbol{\beta} - \boldsymbol{\gamma}\|_2. \quad (47)$$

We conclude the proof by combining Equations (44) and (47):

$$\begin{aligned} \|\nabla L^\tau(\boldsymbol{\beta}) - \nabla L^\tau(\boldsymbol{\gamma})\|_2 & \leq \frac{1}{4n\tau} \|\mathbb{X}\|^2 \|\boldsymbol{\beta} - \boldsymbol{\gamma}\|_2 \\ & = \frac{\mu_{\max}(n^{-1}\mathbb{X}^T\mathbb{X})}{4\tau} \|\boldsymbol{\beta} - \boldsymbol{\gamma}\|_2. \end{aligned}$$

**The case of Quantile Regression:** For the quantile regression loss, the same smoothing method applies.

Let us simply note that:

$$\begin{aligned} \rho_\theta(x) & = \max((\theta - 1)x, \theta x) = \frac{1}{2}((2\theta - 1)x + |x|) \\ & = \max_{|w| \leq 1} \frac{1}{2}((2\theta - 1)x + wx). \end{aligned}$$

Hence we can immediately use the same steps than for the hinge loss – which is a particular case of the quantile regression loss – and define the smooth quantile regression loss  $g_\theta^\tau$ . Its gradient is:

$$\nabla g_\theta^\tau(\boldsymbol{\beta}) = -\frac{1}{2n} \sum_{i=1}^n (2\theta - 1 + w_i^\tau(\boldsymbol{\beta})) y_i \mathbf{x}_i \in \mathbb{R}^p, \quad (48)$$

where we still have  $w_i^\tau = \min(1, \frac{1}{2\tau}|z_i|) \text{sign}(z_i)$  but now  $z_i = y_i - \mathbf{x}_i^T \boldsymbol{\beta}$ ,  $\forall i$ . The Lipschitz constant of  $\nabla g_\theta^\tau$  is still given by Theorem 5.  $\square$

## H Proof of Theorem 6

**Proof:** We still assume  $|h_1| \geq \dots \geq |h_p|$ . Following Equation (21) it holds:

$$S(\mathbf{h}) \leq \Delta(\mathbf{h}) \leq \eta|\boldsymbol{\beta}^*|_S - \eta|\hat{\boldsymbol{\beta}}|_S. \quad (49)$$

We want to upper-bound the right-hand side of Equation (49). We define the permutation  $\phi \in \mathcal{S}_p$  such that  $|\boldsymbol{\beta}^*|_S = \sum_{j=1}^{k^*} \lambda_j |\beta_{\phi(j)}^*|$  and  $|\hat{\boldsymbol{\beta}}_{\phi(k^*+1)}| \geq \dots \geq |\hat{\boldsymbol{\beta}}_{\phi(p)}|$  –  $\phi$  is uniquely defined. Hence it holds:

$$\begin{aligned} \frac{1}{\eta} \Delta(\mathbf{h}) &\leq \sum_{j=1}^{k^*} \lambda_j |\beta_{\phi(j)}^*| - \max_{\psi \in \mathcal{S}_p} \sum_{j=1}^p \lambda_j |\hat{\beta}_{\psi(j)}| \quad \text{by definition of Slope} \\ &\leq \sum_{j=1}^{k^*} \lambda_j \left( |\beta_{\phi(j)}^*| - |\hat{\beta}_{\phi(j)}| \right) - \sum_{j=k^*+1}^p \lambda_j |\hat{\beta}_{\phi(j)}| \quad \text{since } \phi \in \mathcal{S}_p \\ &= \sum_{j=1}^{k^*} \lambda_j |h_{\phi(j)}| - \sum_{j=k^*+1}^p \lambda_j |\hat{\beta}_{\phi(j)}| \\ &\leq \sum_{j=1}^{k^*} \lambda_j |h_{\phi(j)}| - \sum_{j=k^*+1}^p \lambda_j |h_{\phi(j)}|. \end{aligned} \quad (50)$$

Since  $\lambda$  is monotonically non decreasing:  $\sum_{j=1}^{k^*} \lambda_j |h_{\phi(j)}| \leq \sum_{j=1}^{k^*} \lambda_j |h_j|$ .

Because  $|h_{\phi(k^*+1)}| \geq \dots \geq |h_{\phi(p)}|$ :  $\sum_{j=k^*+1}^p \lambda_j |h_j| \leq \sum_{j=k^*+1}^p \lambda_j |h_{\phi(j)}|$ .

In addition, Equation (22) from Appendix B leads to, with probability at least  $1 - \frac{\delta}{2}$ :

$$|S(\mathbf{h})| \leq 14LM \sqrt{\frac{\log(2/\delta)}{n}} \sum_{j=1}^p \lambda_j |h_j| \leq \frac{\eta}{\alpha} |\mathbf{h}|_S,$$

where  $\eta$  is defined in the statement of the theorem. Thus, combining this last equation with Equation (50), it holds with probability at least  $1 - \frac{\delta}{2}$ :

$$-\frac{1}{\alpha} |\mathbf{h}|_S \leq \sum_{j=1}^{k^*} \lambda_j |h_j| - \sum_{j=k^*+1}^p \lambda_j |h_j|,$$

which is equivalent to saying that with probability at least  $1 - \frac{\delta}{2}$ :

$$\sum_{j=k^*+1}^p \lambda_j |h_j| \leq \frac{\alpha + 1}{\alpha - 1} \sum_{j=1}^{k^*} \lambda_j |h_j|, \quad (51)$$

that is  $\mathbf{h} \in \Gamma \left( k^*, \frac{\alpha+1}{\alpha-1} \right)$ . □

## I Proof of Corollary 2

**Proof:** We follow the proof of Theorem 1. Theorem 3 still holds with L1 tolerance loss function – the results for L2 is however no longer true. In addition, the restricted strong convexity derived in Lemma 4

applies for Slope. We consequently obtain with probability at least  $1 - \delta$ :

$$\begin{aligned}
\frac{1}{4}\tilde{\kappa}(k^*, \omega) \{ \|\mathbf{h}\|_2^2 \wedge r(k^*) \|\mathbf{h}\|_2 \} &\leq \tau \|\mathbf{h}\|_1 + \eta \sum_{j=1}^{k^*} \lambda_j |h_j| - \eta \sum_{j=k^*+1}^p \lambda_j |h_j| \\
&\leq \tau \|\mathbf{h}_{S_0}\|_1 + \eta \sum_{j=1}^{k^*} \lambda_j |h_j| + \tau \|\mathbf{h}_{(S_0)^c}\|_1 - \eta \sum_{j=k^*+1}^p \lambda_j |h_j| \quad (52) \\
&\leq \tau \|\mathbf{h}_{S_0}\|_1 + \eta \sum_{j=1}^{k^*} \lambda_j |h_j| + (\tau - \eta \lambda_p) \|\mathbf{h}_{(S_0)^c}\|_1.
\end{aligned}$$

We want  $\tau \leq \eta \lambda_p$ , that is  $14L\mu(k^*)\sqrt{\frac{\log(3)}{n} + \frac{\log(4p/k)}{nk} + \frac{\log(2/\delta)}{nk}} \leq 14\alpha LM\sqrt{\frac{\log(2e)}{n} \log(2/\delta)}$ , which is satisfied since  $\mu(k^*) \leq \alpha M$ . Hence we obtain, similarly to Section E:

$$\begin{aligned}
\frac{1}{4}\tilde{\kappa}(k^*, \omega) \{ \|\mathbf{h}\|_2^2 \wedge r(k^*) \|\mathbf{h}\|_2 \} &\leq \tau \|\mathbf{h}_{S_0}\|_1 + \eta \sum_{j=1}^{k^*} \lambda_j |h_j| \\
&\leq \tau \sqrt{k^*} \|\mathbf{h}_{S_0}\|_2 + \eta \sqrt{k^* \log(2pe/k^*)} \|\mathbf{h}_{S_0}\|_2 \\
&\leq 2\eta \sqrt{k^* \log(2pe/k^*)} \|\mathbf{h}_{S_0}\|_2 \text{ since } \tau \leq \eta \lambda_p \leq \eta \lambda_{k^*} \\
&\leq 28\alpha LM \sqrt{\frac{k^* \log(2pe/k^*)}{n} \log(2/\delta)} \|\mathbf{h}\|_2.
\end{aligned}$$

This last equation is very similar to Equation (40) in the proof of Theorem 1. We conclude the proof identically, and obtain a similar bound in expectation by following the proof of Corollary 1.  $\square$
